# Supplementary material for: Therapeutic Efficacy of YM155 to Regulate an Epigenetic Enzyme in Major Subtypes of RCC
Source: MDPI journal article supplement (doi:10.3390/ijms25010216), 2023-12-22
Supplement: s1 [file s1]

## Supplementary data

**Supplementary Table S1.** List of the primer sequences used for RT-PCR studies.

|                       | Sequence (5'→3')               |
|-----------------------|--------------------------------|
| RT-GAPDH-f            | GAG TCA ACG GAT TTG GTC GT     |
| RT-GAPDH-r            | TGG AAG ATG GTG ATG GGA TT     |
| RT-BIRC5-f            | GAC GAC CCC ATA GAG GAA CAT A  |
| RT-BIRC5-r            | TTT CCT TTG CAA TTT TGT TCT TG |
| RT-EP300-f            | CGC TTT GTC TAC ACC TGC AA     |
| RT-EP300-r            | TGC TGG TTG TTG CTC TCA TC     |
| RT-EZH2-f             | GAC CTC TGT CTT ACT TGT GGA GC |
| RT-EZH2-r             | CGT CAG ATG GTG CCA GCA ATA G  |
| ChIP-BIRC5 promoter-f | CCA CCG CAT CTC TAC ATT CA     |
| ChIP-BIRC5 promoter-r | TTT CCT TTG CAA TTT TGT TCT TG |

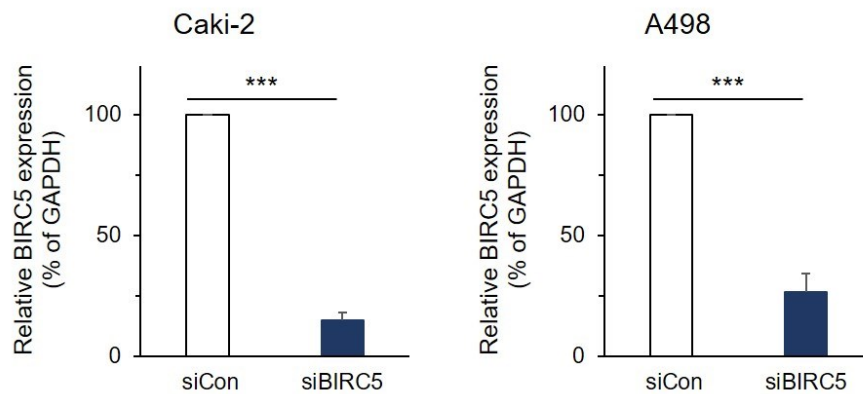

**Supplementary Figure S1.** BIRC5 mRNA levels were assessed by qRT-PCR in a second ccRCC cell line, Caki-2, and a second pRCC cell line, A498, transfected with the indicated siRNAs. Results represent mean  $\pm$  SD of three independent experiments (\*\*p<0.01 compared to siCon, t-test).

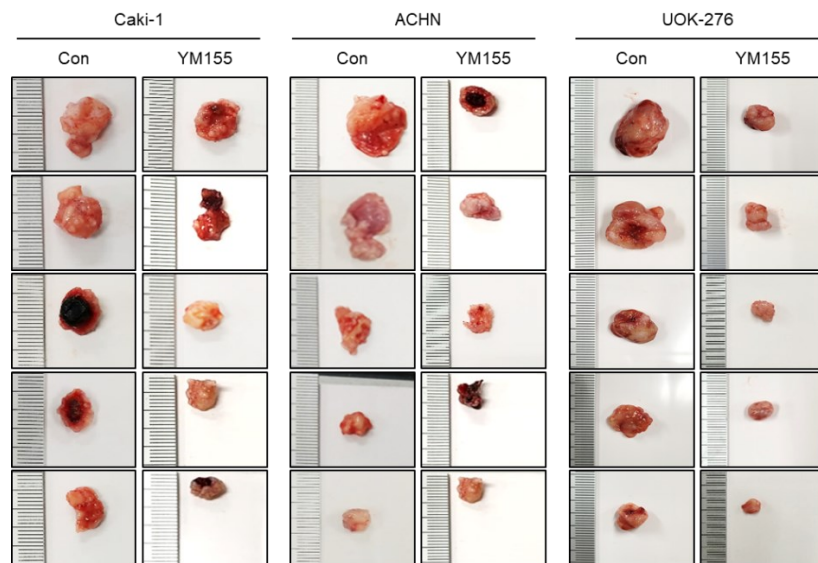

**Supplementary Figure S2.** Representative images of xenografts in the control and YM155 treated groups injected with Caki-1, ACHN, and UOK-276 cells at the end of the experiment.
